# Supplementary material for: Neonatal Deletion of Hand1 and Hand2 within Murine Cardiac Conduction System Reveals a Novel Role for HAND2 in Rhythm Homeostasis
Source: MDPI journal article supplement (doi:10.3390/jcdd9070214), 2022-07-04
Supplement: s1 [file s1]

**Table S7. Summary of epicardial voltage mapping in *H2LVCreCKO* and *H2control* hearts.**

|                                                                                                | Male                    |                  | Female                   |                  |
|------------------------------------------------------------------------------------------------|-------------------------|------------------|--------------------------|------------------|
| N                                                                                              | 14                      | 7                | 27                       | 9                |
| Genotype                                                                                       | <i>H2LVCreCKO</i>       | <i>H2control</i> | <i>H2LVCreCKO</i>        | <i>H2control</i> |
| LV breakthroughs                                                                               |                         |                  |                          |                  |
| 0                                                                                              | 2                       | 2                | 2                        | 1                |
| 1                                                                                              | 10                      | 5                | 23                       | 6                |
| 2                                                                                              | 1                       | 0                | 2                        | 2                |
| 3                                                                                              | 1                       | 0                | 0                        | 0                |
| RV breakthroughs                                                                               |                         |                  |                          |                  |
| 0                                                                                              | 0                       | 0                | 5                        | 2                |
| 1                                                                                              | 14                      | 7                | 20                       | 7                |
| 2                                                                                              | 0                       | 0                | 2                        | 0                |
| Delay, ms                                                                                      | 1.9 ± 1.1*              | 0.3 ± 0.5        | 1.3 ± 0.9                | 0.7 ± 0.8        |
| RBBB                                                                                           | 0                       | 0                | 5                        | 2                |
| LBBB                                                                                           | 2                       | 2                | 2                        | 1                |
| Interval between RA depolarization and first epicardial breakthrough in hearts without BBB, ms | 38.3 ± 1.2 <sup>#</sup> | 29.0 ± 2.7       | 40.0 ± 1.2 <sup>\$</sup> | 32.8 ± 1.6       |

Values for delay and interval between RA depolarization and first epicardial breakthrough are mean ± SEM. \*P=0.004, <sup>#</sup>P=0.002 and <sup>\$</sup>P=0.009 by *t*-test versus *H2control*. RBBB, right bundle branch block; LBBB, left bundle branch block.
