# Supplementary material for: Neonatal Deletion of Hand1 and Hand2 within Murine Cardiac Conduction System Reveals a Novel Role for HAND2 in Rhythm Homeostasis
Source: MDPI journal article supplement (doi:10.3390/jcdd9070214), 2022-07-04
Supplement: s1 [file s1]

Table S3 A: ECG analysis of *Cntn2*<sup>Cre</sup> *H2*<sup>fx/fx</sup>

| Males - LEAD I   |   |                                                        |                  |                           |                          |                           |               |
|------------------|---|--------------------------------------------------------|------------------|---------------------------|--------------------------|---------------------------|---------------|
| Age (weeks)      | n | Genotype                                               | Heart rate (bpm) | PR interval (ms)          | QRS1 (ms)                | QRS2 (ms)                 | QTc (ms)      |
| 5                | 7 | <i>Cntn2</i> <sup>Cre</sup> <i>H2</i> <sup>fx/fx</sup> | 517 ± 57         | 29.24 ± 2.49*             | 6.64 ± 0.61              | 8.94 ± 0.38*              | 40.04 ± 0.51  |
|                  | 9 | <i>H2</i> <sup>fx/fx</sup>                             | 509 ± 49         | 33.48 ± 2.52              | 6.74 ± 0.39              | 9.42 ± 0.64               | 39.48 ± 0.62  |
| 10               | 7 | <i>Cntn2</i> <sup>Cre</sup> <i>H2</i> <sup>fx/fx</sup> | 517 ± 28*        | 27.72 ± 3.76*             | 9.13 ± 0.10              | 11.05 ± 0.17              | 33.98 ± 6.41  |
|                  | 8 | <i>H2</i> <sup>fx/fx</sup>                             | 550 ± 27         | 32.34 ± 3.62              | 8.41 ± 0.66              | 10.42 ± 0.98              | 35.54 ± 5.40  |
| 15               | 6 | <i>Cntn2</i> <sup>Cre</sup> <i>H2</i> <sup>fx/fx</sup> | 532 ± 47         | 25.72 ± 3.66*             | 9.62 ± 0.12              | 11.62 ± 0.12              | 37.49 ± 7.98  |
|                  | 8 | <i>H2</i> <sup>fx/fx</sup>                             | 525 ± 49         | 31.41 ± 3.24              | 9.02 ± 0.81              | 11.92 ± 0.10              | 40.96 ± 4.93  |
| 20               | 7 | <i>Cntn2</i> <sup>Cre</sup> <i>H2</i> <sup>fx/fx</sup> | 521 ± 23*        | 29.44 ± 5.67*             | 9.29 ± 1.29              | 11.05 ± 2.02              | 47.30 ± 3.49  |
|                  | 7 | <i>H2</i> <sup>fx/fx</sup>                             | 550 ± 35         | 34.36 ± 4.68              | 9.38 ± 0.64              | 11.74 ± 1.23              | 44.09 ± 6.02  |
| 25               | 6 | <i>Cntn2</i> <sup>Cre</sup> <i>H2</i> <sup>fx/fx</sup> | 542 ± 67         | 25.01 ± 2.86 <sup>#</sup> | 6.72 ± 0.51              | 8.48 ± 0.89               | 38.62 ± 4.40  |
|                  | 7 | <i>H2</i> <sup>fx/fx</sup>                             | 586 ± 44         | 32.76 ± 3.79              | 7.09 ± 0.72              | 9.38 ± 0.93               | 37.79 ± 2.37  |
| Females - LEAD I |   |                                                        |                  |                           |                          |                           |               |
| Age (weeks)      | n | Genotype                                               | Heart rate (bpm) | PR interval (ms)          | QRS1 (ms)                | QRS2 (ms)                 | QTc (ms)      |
| 5                | 8 | <i>Cntn2</i> <sup>Cre</sup> <i>H2</i> <sup>fx/fx</sup> | 492 ± 50         | 31.52 ± 4.08              | 7.08 ± 0.70 <sup>#</sup> | 14.84 ± 1.65              | 43.98 ± 7.56  |
|                  | 5 | <i>H2</i> <sup>fx/fx</sup>                             | 535 ± 106        | 33.71 ± 2.98              | 8.30 ± 0.34              | 11.78 ± 1.89              | 48.87 ± 12.49 |
| 10               | 8 | <i>Cntn2</i> <sup>Cre</sup> <i>H2</i> <sup>fx/fx</sup> | 499 ± 55         | 28.33 ± 4.73              | 9.24 ± 0.82              | 12.07 ± 1.22              | 47.29 ± 5.59  |
|                  | 4 | <i>H2</i> <sup>fx/fx</sup>                             | 532 ± 15         | 30.57 ± 1.83              | 9.00 ± 0.56              | 12.47 ± 2.45              | 46.45 ± 1.86  |
| 15               | 8 | <i>Cntn2</i> <sup>Cre</sup> <i>H2</i> <sup>fx/fx</sup> | 535 ± 52         | 31.22 ± 5.07              | 9.03 ± 0.85              | 11.89 ± 0.12              | 44.58 ± 6.18  |
|                  | 4 | <i>H2</i> <sup>fx/fx</sup>                             | 569 ± 49         | 33.24 ± 4.94              | 8.32 ± 0.46              | 12.13 ± 0.14              | 43.08 ± 3.12  |
| 20               | 8 | <i>Cntn2</i> <sup>Cre</sup> <i>H2</i> <sup>fx/fx</sup> | 565 ± 124        | 29.38 ± 4.64*             | 8.64 ± 0.82              | 10.89 ± 0.75 <sup>#</sup> | 48.19 ± 8.21  |
|                  | 4 | <i>H2</i> <sup>fx/fx</sup>                             | 521 ± 44         | 35.87 ± 4.31              | 8.65 ± 1.09              | 9.99 ± 0.71               | 45.61 ± 3.59  |
| 25               | 7 | <i>Cntn2</i> <sup>Cre</sup> <i>H2</i> <sup>fx/fx</sup> | 529 ± 69         | 29.04 ± 3.84              | 9.16 ± 1.11              | 11.44 ± 1.02              | 46.40 ± 3.39* |
|                  | 4 | <i>H2</i> <sup>fx/fx</sup>                             | 564 ± 92         | 32.82 ± 5.79              | 8.65 ± 0.93              | 11.55 ± 1.60              | 46.51 ± 5.55  |

| Males - LEAD II   |   |                                                        |                           |                          |                           |               |  |
|-------------------|---|--------------------------------------------------------|---------------------------|--------------------------|---------------------------|---------------|--|
| Age (weeks)       | n | Genotype                                               | PR interval (ms)          | QRS1 (ms)                | QRS2 (ms)                 | QTc (ms)      |  |
| 5                 | 7 | <i>Cntn2</i> <sup>Cre</sup> <i>H2</i> <sup>fx/fx</sup> | 29.20 ± 2.22*             | 6.62 ± 0.38              | 9.26 ± 0.09               | 36.02 ± 0.15  |  |
|                   | 9 | <i>H2</i> <sup>fx/fx</sup>                             | 34.59 ± 2.94              | 6.97 ± 0.53              | 9.22 ± 0.72               | 37.53 ± 0.36  |  |
| 10                | 7 | <i>Cntn2</i> <sup>Cre</sup> <i>H2</i> <sup>fx/fx</sup> | 26.54 ± 3.57 <sup>#</sup> | 8.26 ± 1.04              | 11.29 ± 0.18              | 32.74 ± 7.39  |  |
|                   | 8 | <i>H2</i> <sup>fx/fx</sup>                             | 32.72 ± 3.78              | 7.57 ± 0.86              | 10.06 ± 0.93              | 38.49 ± 4.92  |  |
| 15                | 6 | <i>Cntn2</i> <sup>Cre</sup> <i>H2</i> <sup>fx/fx</sup> | 26.24 ± 4.59 <sup>#</sup> | 8.85 ± 0.88              | 10.84 ± 0.17              | 40.03 ± 2.86  |  |
|                   | 8 | <i>H2</i> <sup>fx/fx</sup>                             | 31.10 ± 1.76              | 8.03 ± 0.76              | 10.84 ± 0.97              | 34.84 ± 6.92  |  |
| 20                | 7 | <i>Cntn2</i> <sup>Cre</sup> <i>H2</i> <sup>fx/fx</sup> | 29.99 ± 5.43*             | 8.72 ± 1.56              | 11.14 ± 2.14              | 45.01 ± 4.34* |  |
|                   | 7 | <i>H2</i> <sup>fx/fx</sup>                             | 35.86 ± 4.93              | 8.90 ± 1.26              | 11.36 ± 1.44              | 39.44 ± 5.68  |  |
| 25                | 6 | <i>Cntn2</i> <sup>Cre</sup> <i>H2</i> <sup>fx/fx</sup> | 30.86 ± 2.83              | 6.84 ± 0.92              | 9.44 ± 0.89               | 37.53 ± 2.75  |  |
|                   | 7 | <i>H2</i> <sup>fx/fx</sup>                             | 30.82 ± 2.67              | 7.25 ± 0.91              | 9.38 ± 0.93               | 39.53 ± 7.75  |  |
| Females - LEAD II |   |                                                        |                           |                          |                           |               |  |
| Age (weeks)       | n | Genotype                                               | PR interval (ms)          | QRS1 (ms)                | QRS2 (ms)                 | QTc (ms)      |  |
| 5                 | 8 | <i>Cntn2</i> <sup>Cre</sup> <i>H2</i> <sup>fx/fx</sup> | 32.75 ± 3.79              | 6.75 ± 0.76              | 9.03 ± 0.88               | 45.16 ± 7.63  |  |
|                   | 5 | <i>H2</i> <sup>fx/fx</sup>                             | 34.87 ± 3.62              | 6.80 ± 0.41              | 9.06 ± 0.64               | 46.31 ± 13.11 |  |
| 10                | 8 | <i>Cntn2</i> <sup>Cre</sup> <i>H2</i> <sup>fx/fx</sup> | 30.66 ± 4.87              | 9.26 ± 1.58*             | 12.04 ± 1.54              | 44.01 ± 5.68  |  |
|                   | 4 | <i>H2</i> <sup>fx/fx</sup>                             | 34.26 ± 3.77              | 7.27 ± 0.23              | 11.01 ± 2.79              | 41.65 ± 3.86  |  |
| 15                | 8 | <i>Cntn2</i> <sup>Cre</sup> <i>H2</i> <sup>fx/fx</sup> | 29.54 ± 5.90              | 9.02 ± 2.17              | 11.84 ± 0.21              | 43.93 ± 5.48  |  |
|                   | 4 | <i>H2</i> <sup>fx/fx</sup>                             | 32.54 ± 4.57              | 7.67 ± 0.79              | 11.05 ± 2.26              | 42.15 ± 7.45  |  |
| 20                | 8 | <i>Cntn2</i> <sup>Cre</sup> <i>H2</i> <sup>fx/fx</sup> | 30.01 ± 5.81*             | 8.58 ± 0.71 <sup>#</sup> | 11.10 ± 1.01 <sup>#</sup> | 46.90 ± 5.18  |  |
|                   | 4 | <i>H2</i> <sup>fx/fx</sup>                             | 37.07 ± 5.19              | 7.23 ± 0.18              | 9.51 ± 0.39               | 43.53 ± 2.84  |  |
| 25                | 7 | <i>Cntn2</i> <sup>Cre</sup> <i>H2</i> <sup>fx/fx</sup> | 29.32 ± 5.19              | 8.29 ± 0.57*             | 10.84 ± 0.58*             | 45.67 ± 3.79  |  |
|                   | 4 | <i>H2</i> <sup>fx/fx</sup>                             | 33.81 ± 6.18              | 7.58 ± 0.61              | 9.65 ± 0.62               | 43.09 ± 2.86  |  |

Normality calculated with Shapiro-Wilk normality test. For normal data sets, student's T-test used to calculate significance. For not normal data sets, Mann-Whitney U test used to calculate significance.

@ Data not normal      # p<0.01      \* p<0.05 vs H2control
