# Supplementary material for: Neonatal Deletion of Hand1 and Hand2 within Murine Cardiac Conduction System Reveals a Novel Role for HAND2 in Rhythm Homeostasis
Source: MDPI journal article supplement (doi:10.3390/jcdd9070214), 2022-07-04
Supplement: s1 [file s1]

Table S2. ECG Analysis of *Cntn2*<sup>Cre</sup> *H1*<sup>fx/fx</sup>

| Males - LEAD I |    |                                                        |                  |                  |              |              |               |
|----------------|----|--------------------------------------------------------|------------------|------------------|--------------|--------------|---------------|
| Age (weeks)    | n  | Genotype                                               | Heart rate (bpm) | PR interval (ms) | QRS1 (ms)    | QRS2 (ms)    | QTc (ms)      |
| 5              | 8  | <i>Cntn2</i> <sup>Cre</sup> <i>H1</i> <sup>fx/fx</sup> | 377 ± 39         | 42.34 ± 3.77     | 8.92 ± 0.13  | 11.56 ± 0.10 | 46.88 ± 11.15 |
|                | 10 | <i>H1</i> <sup>fx/fx</sup>                             | 417 ± 57         | 40.32 ± 7.38     | 8.43 ± 0.84  | 11.11 ± 0.95 | 46.01 ± 12.48 |
| 10             | 8  | <i>Cntn2</i> <sup>Cre</sup> <i>H1</i> <sup>fx/fx</sup> | 412 ± 50         | 41.76 ± 5.51     | 9.46 ± 1.46  | 11.46 ± 1.35 | 39.36 ± 6.97  |
|                | 10 | <i>H1</i> <sup>fx/fx</sup>                             | 436 ± 51         | 40.63 ± 5.29     | 9.29 ± 0.96  | 11.58 ± 1.02 | 44.16 ± 5.76  |
| 15             | 9  | <i>Cntn2</i> <sup>Cre</sup> <i>H1</i> <sup>fx/fx</sup> | 454 ± 103        | 41.63 ± 2.79     | 9.43 ± 1.13  | 11.24 ± 0.81 | 39.96 ± 8.84  |
|                | 10 | <i>H1</i> <sup>fx/fx</sup>                             | 468 ± 64         | 40.01 ± 4.63     | 9.35 ± 0.79  | 11.27 ± 1.10 | 45.37 ± 5.46  |
| 20             | 9  | <i>Cntn2</i> <sup>Cre</sup> <i>H1</i> <sup>fx/fx</sup> | 440 ± 56         | 48.11 ± 4.79     | 9.15 ± 0.79  | 11.09 ± 0.71 | 49.09 ± 25.33 |
|                | 10 | <i>H1</i> <sup>fx/fx</sup>                             | 474 ± 46         | 46.41 ± 5.16     | 9.16 ± 0.84  | 10.83 ± 0.99 | 43.10 ± 7.65  |
| 25             | 7  | <i>Cntn2</i> <sup>Cre</sup> <i>H1</i> <sup>fx/fx</sup> | 459 ± 69         | 45.22 ± 6.04     | 8.92 ± 0.80  | 11.23 ± 0.80 | 45.98 ± 3.51  |
|                | 10 | <i>H1</i> <sup>fx/fx</sup>                             | 465 ± 38         | 43.12 ± 4.97     | 10.06 ± 2.64 | 12.16 ± 2.54 | 47.24 ± 6.93  |

| Females - LEAD I |   |                                                        |                       |                           |              |              |               |
|------------------|---|--------------------------------------------------------|-----------------------|---------------------------|--------------|--------------|---------------|
| Age (weeks)      | n | Genotype                                               | Heart rate (bpm)      | PR interval (ms)          | QRS1 (ms)    | QRS2 (ms)    | QTc (ms)      |
| 5                | 9 | <i>Cntn2</i> <sup>Cre</sup> <i>H1</i> <sup>fx/fx</sup> | 371 ± 28 <sup>#</sup> | 39.71 ± 2.94              | 9.14 ± 0.79  | 11.55 ± 1.10 | 46.89 ± 8.43  |
|                  | 4 | <i>H1</i> <sup>fx/fx</sup>                             | 422 ± 9               | 36.53 ± 3.96              | 8.72 ± 0.91  | 11.13 ± 1.24 | 49.95 ± 15.10 |
| 10               | 9 | <i>Cntn2</i> <sup>Cre</sup> <i>H1</i> <sup>fx/fx</sup> | 412 ± 35              | 41.23 ± 5.91              | 9.31 ± 1.14  | 11.26 ± 1.10 | 51.25 ± 10.81 |
|                  | 4 | <i>H1</i> <sup>fx/fx</sup>                             | 397 ± 55              | 39.84 ± 4.68              | 9.41 ± 0.65  | 12.23 ± 0.52 | 47.78 ± 9.36  |
| 15               | 8 | <i>Cntn2</i> <sup>Cre</sup> <i>H1</i> <sup>fx/fx</sup> | 390 ± 57              | 41.94 ± 3.71              | 10.34 ± 0.29 | 12.76 ± 2.54 | 52.09 ± 19.98 |
|                  | 4 | <i>H1</i> <sup>fx/fx</sup>                             | 383 ± 50              | 40.31 ± 2.90              | 8.9 ± 1.10   | 11.69 ± 1.73 | 44.13 ± 5.23  |
| 20               | 7 | <i>Cntn2</i> <sup>Cre</sup> <i>H1</i> <sup>fx/fx</sup> | 446 ± 65              | 46.09 ± 7.26              | 9.99 ± 0.78  | 12.58 ± 1.12 | 50.10 ± 5.69  |
|                  | 4 | <i>H1</i> <sup>fx/fx</sup>                             | 469 ± 24              | 44.64 ± 2.97              | 9.26 ± 0.92  | 11.39 ± 1.30 | 50.41 ± 2.30  |
| 25               | 8 | <i>Cntn2</i> <sup>Cre</sup> <i>H1</i> <sup>fx/fx</sup> | 469 ± 46              | 44.93 ± 3.35 <sup>#</sup> | 9.56 ± 1.53  | 11.89 ± 1.74 | 46.86 ± 7.52  |
|                  | 4 | <i>H1</i> <sup>fx/fx</sup>                             | 444 ± 65              | 39.48 ± 2.35              | 10.15 ± 1.85 | 13.14 ± 3.23 | 61.46 ± 49.75 |

| Males - LEAD II |    |                                                        |                  |                          |              |               |  |
|-----------------|----|--------------------------------------------------------|------------------|--------------------------|--------------|---------------|--|
| Age (weeks)     | n  | Genotype                                               | PR interval (ms) | QRS1 (ms)                | QRS2 (ms)    | QTc (ms)      |  |
| 5               | 8  | <i>Cntn2</i> <sup>Cre</sup> <i>H1</i> <sup>fx/fx</sup> | 42.12 ± 6.08     | 9.82 ± 0.11 <sup>*</sup> | 12.34 ± 0.91 | 48.66 ± 11.39 |  |
|                 | 10 | <i>H1</i> <sup>fx/fx</sup>                             | 40.23 ± 4.48     | 9.13 ± 0.48              | 11.79 ± 0.34 | 44.78 ± 15.73 |  |
| 10              | 8  | <i>Cntn2</i> <sup>Cre</sup> <i>H1</i> <sup>fx/fx</sup> | 41.23 ± 5.27     | 9.74 ± 1.26              | 11.45 ± 1.03 | 38.79 ± 5.35  |  |
|                 | 10 | <i>H1</i> <sup>fx/fx</sup>                             | 40.23 ± 6.34     | 9.25 ± 0.82              | 11.33 ± 0.55 | 40.06 ± 5.04  |  |
| 15              | 9  | <i>Cntn2</i> <sup>Cre</sup> <i>H1</i> <sup>fx/fx</sup> | 40.15 ± 3.63     | 9.68 ± 0.89              | 12.17 ± 0.84 | 37.94 ± 3.88  |  |
|                 | 10 | <i>H1</i> <sup>fx/fx</sup>                             | 40.01 ± 4.17     | 9.49 ± 0.12              | 11.58 ± 0.83 | 39.57 ± 3.79  |  |
| 20              | 9  | <i>Cntn2</i> <sup>Cre</sup> <i>H1</i> <sup>fx/fx</sup> | 48.91 ± 3.13     | 10.54 ± 3.23             | 12.52 ± 3.60 | 42.28 ± 7.97  |  |
|                 | 10 | <i>H1</i> <sup>fx/fx</sup>                             | 47.08 ± 6.74     | 8.82 ± 0.16              | 10.99 ± 1.56 | 44.29 ± 7.68  |  |
| 25              | 7  | <i>Cntn2</i> <sup>Cre</sup> <i>H1</i> <sup>fx/fx</sup> | 44.56 ± 4.83     | 9.39 ± 0.95              | 12.11 ± 1.27 | 41.02 ± 3.84  |  |
|                 | 10 | <i>H1</i> <sup>fx/fx</sup>                             | 41.24 ± 3.29     | 9.92 ± 0.86              | 12.21 ± 1.06 | 39.65 ± 0.92  |  |

| Females - LEAD II |   |                                                        |                           |              |              |                           |  |
|-------------------|---|--------------------------------------------------------|---------------------------|--------------|--------------|---------------------------|--|
| Age (weeks)       | n | Genotype                                               | PR interval (ms)          | QRS1 (ms)    | QRS2 (ms)    | QTc (ms)                  |  |
| 5                 | 9 | <i>Cntn2</i> <sup>Cre</sup> <i>H1</i> <sup>fx/fx</sup> | 38.55 ± 3.71              | 9.07 ± 1.07  | 11.28 ± 1.38 | 39.54 ± 5.64              |  |
|                   | 4 | <i>H1</i> <sup>fx/fx</sup>                             | 36.37 ± 4.46              | 8.96 ± 0.42  | 11.53 ± 0.77 | 38.44 ± 3.73              |  |
| 10                | 9 | <i>Cntn2</i> <sup>Cre</sup> <i>H1</i> <sup>fx/fx</sup> | 40.73 ± 5.81              | 9.49 ± 0.92  | 11.95 ± 1.28 | 39.92 ± 6.32              |  |
|                   | 4 | <i>H1</i> <sup>fx/fx</sup>                             | 38.23 ± 3.46              | 8.96 ± 0.59  | 11.57 ± 0.27 | 34.45 ± 4.69              |  |
| 15                | 8 | <i>Cntn2</i> <sup>Cre</sup> <i>H1</i> <sup>fx/fx</sup> | 41.66 ± 3.88              | 9.95 ± 0.13  | 12.76 ± 1.35 | 42.52 ± 7.83              |  |
|                   | 4 | <i>H1</i> <sup>fx/fx</sup>                             | 40.49 ± 2.64              | 9.49 ± 0.11  | 11.51 ± 1.19 | 35.73 ± 5.42              |  |
| 20                | 7 | <i>Cntn2</i> <sup>Cre</sup> <i>H1</i> <sup>fx/fx</sup> | 48.51 ± 7.49              | 8.93 ± 0.81  | 12.09 ± 1.32 | 51.70 ± 21.88             |  |
|                   | 4 | <i>H1</i> <sup>fx/fx</sup>                             | 44.61 ± 2.44              | 10.89 ± 3.14 | 14.35 ± 5.92 | 45.76 ± 9.94              |  |
| 25                | 8 | <i>Cntn2</i> <sup>Cre</sup> <i>H1</i> <sup>fx/fx</sup> | 44.30 ± 4.49 <sup>*</sup> | 9.08 ± 0.99  | 11.37 ± 1.38 | 37.18 ± 6.05 <sup>#</sup> |  |
|                   | 4 | <i>H1</i> <sup>fx/fx</sup>                             | 38.42 ± 3.29              | 9.54 ± 0.64  | 11.52 ± 0.58 | 47.74 ± 5.83              |  |

Normality calculated with Shapiro-Wilk normality test. For normal data sets, student's T-test used to calculate significance. For not normal data sets, Mann-Whitney U test used to calculate significance.

@ Data not normal      # p<0.01      \* p<0.05 vs H1control
