# Supplementary material for: Neonatal Deletion of Hand1 and Hand2 within Murine Cardiac Conduction System Reveals a Novel Role for HAND2 in Rhythm Homeostasis
Source: MDPI journal article supplement (doi:10.3390/jcdd9070214), 2022-07-04
Supplement: s1 [file s1]

**Table S1:** Table of Alleles used for experiments

| Allele                                                                                                | Abbreviated Allele                           | Reference                                                                                                                                                                                                         |
|-------------------------------------------------------------------------------------------------------|----------------------------------------------|-------------------------------------------------------------------------------------------------------------------------------------------------------------------------------------------------------------------|
| <i>Cntn2</i> <sup>3'UTR-IRES-Cre-EGFP</sup>                                                           | <i>Cntn2</i> <sup>Cre-EGFP/+</sup>           | Bhattacharyya, S., M. Bhakta, and N.V. Munshi, <i>Phenotypically silent Cre recombination within the postnatal ventricular conduction system</i> . PLoS One, 2017. <b>12</b> (3): p. e0174517                     |
| <i>Hand1</i> <sup>LV-Cre</sup>                                                                        | <i>Hand1</i> <sup>LV-Cre</sup>               | Vincentz, J.W., et al., <i>Hand factor ablation causes defective left ventricular chamber development and compromised adult cardiac function</i> . PLoS Genet, 2017. <b>13</b> (7): p. e1006922                   |
| <i>Hand1</i> <sup>tm2Eno</sup>                                                                        | <i>Hand1</i> <sup>fx/fx</sup><br>(H1control) | McFadden, D.G., et al., <i>The Hand1 and Hand2 transcription factors regulate expansion of the embryonic cardiac ventricles in a gene dosage-dependent manner</i> . Development, 2005. <b>132</b> (1): p. 189-201 |
| <i>Hand2</i> <sup>tm1Cse</sup>                                                                        | <i>Hand2</i> <sup>fx/fx</sup><br>(H2control) | Morikawa, Y. and P. Cserjesi, <i>Cardiac neural crest expression of Hand2 regulates outflow and second heart field development</i> . Circ Res, 2008. <b>103</b> (12): p. 1422-9                                   |
| <i>Hand1</i> <sup>fx/fx</sup> <i>Hand2</i> <sup>fx/fx</sup>                                           | H1H2control                                  |                                                                                                                                                                                                                   |
| <i>Cntn2</i> <sup>Cre-EGFP/+</sup> ;<br><i>Hand1</i> <sup>fx/fx</sup>                                 | H1CKO                                        |                                                                                                                                                                                                                   |
| <i>Cntn2</i> <sup>Cre-EGFP/+</sup> ;<br><i>Hand2</i> <sup>fx/fx</sup>                                 | H2CKO                                        |                                                                                                                                                                                                                   |
| <i>Cntn2</i> <sup>Cre-EGFP/+</sup> ;<br><i>Hand1</i> <sup>fx/fx</sup> ; <i>Hand2</i> <sup>fx/fx</sup> | H1H2CKO                                      |                                                                                                                                                                                                                   |
| <i>Hand1</i> <sup>LV-Cre</sup> ;<br><i>Hand2</i> <sup>fx/fx</sup>                                     | H2LVCreCKO                                   |                                                                                                                                                                                                                   |
