# Supplementary material for: Neonatal Deletion of Hand1 and Hand2 within Murine Cardiac Conduction System Reveals a Novel Role for HAND2 in Rhythm Homeostasis
Source: MDPI journal article supplement (doi:10.3390/jcdd9070214), 2022-07-04
Supplement: s1 [file s1]

**Table S4: ECG Analysis of *Cntn2*<sup>Cre</sup> *H1*<sup>fx/fx</sup> *H2*<sup>fx/fx</sup>**

| Males - LEAD I |   |                                                                                   |                  |                           |              |              |               |
|----------------|---|-----------------------------------------------------------------------------------|------------------|---------------------------|--------------|--------------|---------------|
| Age (weeks)    | n | Genotype                                                                          | Heart rate (bpm) | PR interval (ms)          | QRS1 (ms)    | QRS2 (ms)    | QTc (ms)      |
| 5              | 7 | <i>Cntn2</i> <sup>Cre</sup> <i>H1</i> <sup>fx/fx</sup> <i>H2</i> <sup>fx/fx</sup> | 447 ± 52         | 29.42 ± 2.65              | 9.49 ± 0.69  | 13.49 ± 2.29 | 48.84 ± 5.37  |
|                | 5 | <i>H1</i> <sup>fx/fx</sup> <i>H2</i> <sup>fx/fx</sup>                             | 502 ± 30         | 32.63 ± 4.44              | 9.35 ± 0.69  | 13.44 ± 1.98 | 54.82 ± 9.74  |
| 10             | 7 | <i>Cntn2</i> <sup>Cre</sup> <i>H1</i> <sup>fx/fx</sup> <i>H2</i> <sup>fx/fx</sup> | 504 ± 50         | 31.77 ± 1.20 <sup>#</sup> | 8.14 ± 0.58  | 11.21 ± 0.15 | 42.09 ± 5.85  |
|                | 5 | <i>H1</i> <sup>fx/fx</sup> <i>H2</i> <sup>fx/fx</sup>                             | 513 ± 43         | 33.71 ± 1.01              | 7.56 ± 0.51  | 10.24 ± 1.13 | 39.69 ± 5.49  |
| 15             | 6 | <i>Cntn2</i> <sup>Cre</sup> <i>H1</i> <sup>fx/fx</sup> <i>H2</i> <sup>fx/fx</sup> | 517 ± 56         | 33.39 ± 2.91              | 7.85 ± 0.55  | 11.36 ± 1.96 | 37.41 ± 7.08  |
|                | 5 | <i>H1</i> <sup>fx/fx</sup> <i>H2</i> <sup>fx/fx</sup>                             | 527 ± 51         | 33.96 ± 4.43              | 7.41 ± 0.61  | 10.58 ± 1.21 | 38.09 ± 2.64  |
| 20             | 7 | <i>Cntn2</i> <sup>Cre</sup> <i>H1</i> <sup>fx/fx</sup> <i>H2</i> <sup>fx/fx</sup> | 578 ± 41         | 30.94 ± 2.47*             | 8.07 ± 1.03  | 10.68 ± 1.42 | 38.32 ± 7.59  |
|                | 5 | <i>H1</i> <sup>fx/fx</sup> <i>H2</i> <sup>fx/fx</sup>                             | 541 ± 61         | 34.25 ± 2.37              | 8.39 ± 1.52  | 10.92 ± 2.22 | 42.65 ± 13.25 |
| 25             | 7 | <i>Cntn2</i> <sup>Cre</sup> <i>H1</i> <sup>fx/fx</sup> <i>H2</i> <sup>fx/fx</sup> | 596 ± 65         | 30.83 ± 2.24              | 8.49 ± 0.59* | 11.11 ± 2.05 | 40.30 ± 4.66  |
|                | 5 | <i>H1</i> <sup>fx/fx</sup> <i>H2</i> <sup>fx/fx</sup>                             | 563 ± 50         | 36.59 ± 9.60              | 7.67 ± 0.80  | 10.34 ± 1.03 | 39.41 ± 4.95  |

| Females - LEAD I |   |                                                                                   |                  |                           |              |              |               |
|------------------|---|-----------------------------------------------------------------------------------|------------------|---------------------------|--------------|--------------|---------------|
| Age (weeks)      | n | Genotype                                                                          | Heart rate (bpm) | PR interval (ms)          | QRS1 (ms)    | QRS2 (ms)    | QTc (ms)      |
| 5                | 7 | <i>Cntn2</i> <sup>Cre</sup> <i>H1</i> <sup>fx/fx</sup> <i>H2</i> <sup>fx/fx</sup> | 452 ± 60         | 27.44 ± 2.30              | 9.81 ± 0.11  | 12.74 ± 2.08 | 47.74 ± 5.37  |
|                  | 4 | <i>H1</i> <sup>fx/fx</sup> <i>H2</i> <sup>fx/fx</sup>                             | 396 ± 32         | 29.49 ± 2.56              | 10.17 ± 0.89 | 13.21 ± 2.09 | 49.53 ± 2.69  |
| 10               | 7 | <i>Cntn2</i> <sup>Cre</sup> <i>H1</i> <sup>fx/fx</sup> <i>H2</i> <sup>fx/fx</sup> | 436 ± 79         | 31.58 ± 4.56              | 7.93 ± 0.75  | 8.14 ± 3.11  | 40.10 ± 6.51  |
|                  | 4 | <i>H1</i> <sup>fx/fx</sup> <i>H2</i> <sup>fx/fx</sup>                             | 449 ± 33         | 33.70 ± 1.71              | 7.94 ± 0.55  | 10.47 ± 1.37 | 38.28 ± 5.69  |
| 15               | 7 | <i>Cntn2</i> <sup>Cre</sup> <i>H1</i> <sup>fx/fx</sup> <i>H2</i> <sup>fx/fx</sup> | 487 ± 40*        | 30.36 ± 3.30              | 7.32 ± 1.06  | 9.84 ± 1.58  | 41.71 ± 2.66  |
|                  | 4 | <i>H1</i> <sup>fx/fx</sup> <i>H2</i> <sup>fx/fx</sup>                             | 442 ± 15         | 33.41 ± 3.77              | 9.54 ± 1.32  | 9.50 ± 1.70  | 43.91 ± 6.57  |
| 20               | 6 | <i>Cntn2</i> <sup>Cre</sup> <i>H1</i> <sup>fx/fx</sup> <i>H2</i> <sup>fx/fx</sup> | 508 ± 56         | 30.06 ± 2.72              | 7.45 ± 0.92  | 9.38 ± 0.74  | 39.36 ± 12.56 |
|                  | 4 | <i>H1</i> <sup>fx/fx</sup> <i>H2</i> <sup>fx/fx</sup>                             | 523 ± 60         | 33.82 ± 4.35              | 7.85 ± 1.06  | 10.17 ± 1.05 | 39.09 ± 3.78  |
| 25               | 7 | <i>Cntn2</i> <sup>Cre</sup> <i>H1</i> <sup>fx/fx</sup> <i>H2</i> <sup>fx/fx</sup> | 531 ± 55         | 29.66 ± 2.39 <sup>#</sup> | 7.98 ± 1.14  | 9.72 ± 0.76* | 42.95 ± 6.33  |
|                  | 4 | <i>H1</i> <sup>fx/fx</sup> <i>H2</i> <sup>fx/fx</sup>                             | 527 ± 64         | 35.11 ± 2.41              | 7.85 ± 0.43  | 10.84 ± 0.86 | 40.82 ± 5.47  |

| Males - LEAD II |   |                                                                                   |                  |              |              |                           |  |
|-----------------|---|-----------------------------------------------------------------------------------|------------------|--------------|--------------|---------------------------|--|
| Age (weeks)     | n | Genotype                                                                          | PR interval (ms) | QRS1 (ms)    | QRS2 (ms)    | QTc (ms)                  |  |
| 5               | 7 | <i>Cntn2</i> <sup>Cre</sup> <i>H1</i> <sup>fx/fx</sup> <i>H2</i> <sup>fx/fx</sup> | 29.37 ± 2.84     | 8.58 ± 0.87  | 12.84 ± 2.47 | 48.80 ± 6.42              |  |
|                 | 5 | <i>H1</i> <sup>fx/fx</sup> <i>H2</i> <sup>fx/fx</sup>                             | 31.54 ± 3.90     | 8.37 ± 0.94  | 12.73 ± 2.26 | 47.70 ± 7.18              |  |
| 10              | 0 | <i>Cntn2</i> <sup>Cre</sup> <i>H1</i> <sup>fx/fx</sup> <i>H2</i> <sup>fx/fx</sup> | 31.96 ± 0.99     | 7.69 ± 0.88  | 10.23 ± 0.73 | 41.81 ± 6.04              |  |
|                 | 0 | <i>H1</i> <sup>fx/fx</sup> <i>H2</i> <sup>fx/fx</sup>                             | 31.48 ± 4.00     | 6.99 ± 0.63  | 9.88 ± 0.49  | 40.64 ± 5.78              |  |
| 15              | 6 | <i>Cntn2</i> <sup>Cre</sup> <i>H1</i> <sup>fx/fx</sup> <i>H2</i> <sup>fx/fx</sup> | 33.23 ± 3.45     | 7.62 ± 0.62* | 10.86 ± 1.84 | 45.92 ± 3.78              |  |
|                 | 5 | <i>H1</i> <sup>fx/fx</sup> <i>H2</i> <sup>fx/fx</sup>                             | 34.10 ± 1.30     | 6.91 ± 0.57  | 9.48 ± 0.71  | 39.56 ± 1.27              |  |
| 20              | 7 | <i>Cntn2</i> <sup>Cre</sup> <i>H1</i> <sup>fx/fx</sup> <i>H2</i> <sup>fx/fx</sup> | 31.55 ± 4.96     | 7.43 ± 0.67  | 10.09 ± 1.50 | 41.35 ± 3.77              |  |
|                 | 5 | <i>H1</i> <sup>fx/fx</sup> <i>H2</i> <sup>fx/fx</sup>                             | 35.72 ± 6.02     | 7.37 ± 0.49  | 9.39 ± 0.46  | 43.91 ± 4.93              |  |
| 25              | 7 | <i>Cntn2</i> <sup>Cre</sup> <i>H1</i> <sup>fx/fx</sup> <i>H2</i> <sup>fx/fx</sup> | 34.24 ± 3.19     | 7.22 ± 0.13  | 10.13 ± 0.18 | 43.37 ± 5.43 <sup>#</sup> |  |
|                 | 5 | <i>H1</i> <sup>fx/fx</sup> <i>H2</i> <sup>fx/fx</sup>                             | 40.23 ± 10.32    | 6.72 ± 0.17  | 8.93 ± 0.31  | 32.32 ± 1.63              |  |

| Females - LEAD II |   |                                                                                   |                           |             |              |               |  |
|-------------------|---|-----------------------------------------------------------------------------------|---------------------------|-------------|--------------|---------------|--|
| Age (weeks)       | n | Genotype                                                                          | PR interval (ms)          | QRS1 (ms)   | QRS2 (ms)    | QTc (ms)      |  |
| 5                 | 7 | <i>Cntn2</i> <sup>Cre</sup> <i>H1</i> <sup>fx/fx</sup> <i>H2</i> <sup>fx/fx</sup> | 28.30 ± 4.02              | 8.44 ± 1.20 | 11.60 ± 2.30 | 46.28 ± 7.58  |  |
|                   | 4 | <i>H1</i> <sup>fx/fx</sup> <i>H2</i> <sup>fx/fx</sup>                             | 31.66 ± 2.51              | 8.27 ± 1.02 | 12.46 ± 3.17 | 47.15 ± 6.24  |  |
| 10                | 7 | <i>Cntn2</i> <sup>Cre</sup> <i>H1</i> <sup>fx/fx</sup> <i>H2</i> <sup>fx/fx</sup> | 31.39 ± 3.75              | 7.47 ± 0.62 | 9.69 ± 1.05  | 38.74 ± 4.19  |  |
|                   | 4 | <i>H1</i> <sup>fx/fx</sup> <i>H2</i> <sup>fx/fx</sup>                             | 34.69 ± 0.68              | 7.02 ± 0.11 | 9.94 ± 1.34  | 36.56 ± 8.13  |  |
| 15                | 7 | <i>Cntn2</i> <sup>Cre</sup> <i>H1</i> <sup>fx/fx</sup> <i>H2</i> <sup>fx/fx</sup> | 31.09 ± 3.25              | 7.17 ± 0.73 | 9.01 ± 1.07* | 39.74 ± 3.98* |  |
|                   | 4 | <i>H1</i> <sup>fx/fx</sup> <i>H2</i> <sup>fx/fx</sup>                             | 33.83 ± 4.07              | 7.73 ± 0.69 | 7.00 ± 0.02  | 45.64 ± 3.55  |  |
| 20                | 6 | <i>Cntn2</i> <sup>Cre</sup> <i>H1</i> <sup>fx/fx</sup> <i>H2</i> <sup>fx/fx</sup> | 31.35 ± 2.22              | 6.33 ± 1.16 | 8.55 ± 0.77  | 39.45 ± 3.49  |  |
|                   | 4 | <i>H1</i> <sup>fx/fx</sup> <i>H2</i> <sup>fx/fx</sup>                             | 34.41 ± 3.55              | 7.14 ± 0.10 | 9.27 ± 0.35  | 38.11 ± 2.73  |  |
| 25                | 7 | <i>Cntn2</i> <sup>Cre</sup> <i>H1</i> <sup>fx/fx</sup> <i>H2</i> <sup>fx/fx</sup> | 30.55 ± 2.47 <sup>#</sup> | 7.96 ± 0.86 | 10.39 ± 1.19 | 42.89 ± 3.41  |  |
|                   | 4 | <i>H1</i> <sup>fx/fx</sup> <i>H2</i> <sup>fx/fx</sup>                             | 35.95 ± 2.38              | 7.67 ± 0.79 | 10.84 ± 0.86 | 39.96 ± 2.31  |  |

Normality calculated with Shapiro-Wilk normality test. For normal data sets, student's T-test used to calculate significance. For not normal data sets, Mann-Whitney U test used to calculate significance.

@ Data not normal      # p<0.01      \* p<0.05 vs H1H2control
