# Supplementary material for: Neonatal Deletion of Hand1 and Hand2 within Murine Cardiac Conduction System Reveals a Novel Role for HAND2 in Rhythm Homeostasis
Source: MDPI journal article supplement (doi:10.3390/jcdd9070214), 2022-07-04
Supplement: s1 [file s1]

## One Way Repeated Measures Analysis of Variance

### Cntn2Cre H2fxfx males

Normality Test (Shapiro-Wilk): Passed (P = 0.074)

Equal Variance Test (Brown-Forsythe): Passed (P = 0.643)

| Treatment Name | N | Missing | Mean   | Std Dev | SEM      |
|----------------|---|---------|--------|---------|----------|
| 5 wk           | 6 | 0       | 0.0298 | 0.00223 | 0.000911 |
| 10 wk          | 6 | 0       | 0.0286 | 0.0033  | 0.00135  |
| 15 wk          | 6 | 0       | 0.0257 | 0.00366 | 0.0015   |
| 20 wk          | 6 | 0       | 0.03   | 0.00601 | 0.00245  |
| 25 wk          | 6 | 0       | 0.025  | 0.00287 | 0.00117  |

| Source of Variation | DF | SS       | MS        | F     | P     |
|---------------------|----|----------|-----------|-------|-------|
| Between Subjects    | 5  | 0.000207 | 0.0000413 |       |       |
| Between Treatments  | 4  | 0.000128 | 0.0000321 | 3.958 | 0.016 |
| Residual            | 20 | 0.000162 | 0.0000081 |       |       |
| Total               | 29 | 0.000497 |           |       |       |

All Pairwise Multiple Comparison Procedures (Student-Newman-Keuls Method) :  
Comparisons for factor:

| Comparison      | Diff of Means | p | q     | P     | P<0.050     |
|-----------------|---------------|---|-------|-------|-------------|
| 20 wk vs. 25 wk | 0.00497       | 5 | 4.278 | 0.047 | Yes         |
| 20 wk vs. 15 wk | 0.00426       | 4 | 3.667 | 0.076 | No          |
| 20 wk vs. 10 wk | 0.00141       | 3 | 1.216 | 0.671 | Do Not Test |
| 20 wk vs. 5 wk  | 0.0002        | 2 | 0.172 | 0.904 | Do Not Test |
| 5 wk vs. 25 wk  | 0.00477       | 4 | 4.106 | 0.04  | Yes         |
| 5 wk vs. 15 wk  | 0.00406       | 3 | 3.495 | 0.056 | Do Not Test |
| 5 wk vs. 10 wk  | 0.00121       | 2 | 1.044 | 0.469 | Do Not Test |
| 10 wk vs. 25 wk | 0.00356       | 3 | 3.062 | 0.102 | No          |
| 10 wk vs. 15 wk | 0.00285       | 2 | 2.451 | 0.099 | Do Not Test |
| 15 wk vs. 25 wk | 0.00071       | 2 | 0.611 | 0.671 | Do Not Test |
