# Supplementary material for: Neonatal Deletion of Hand1 and Hand2 within Murine Cardiac Conduction System Reveals a Novel Role for HAND2 in Rhythm Homeostasis
Source: MDPI journal article supplement (doi:10.3390/jcdd9070214), 2022-07-04
Supplement: s1 [file s1]

**Table S5: ECG Analysis of *Hand1LV-Cre H2<sup>fx/fx</sup>***

| Males - LEAD I |   |                                       |                       |                             |             |                             |               |
|----------------|---|---------------------------------------|-----------------------|-----------------------------|-------------|-----------------------------|---------------|
| Age (weeks)    | n | Genotype                              | Heart rate (bpm)      | PR interval (ms)            | QRS1 (ms)   | QRS2 (ms)                   | QTc (ms)      |
| 5              | 8 | <i>Hand1LV-Cre H2<sup>fx/fx</sup></i> | 486 ± 72              | 31.58 ± 5.23                | 7.27 ± 1.51 | 10.78 ± 1.44                | 38.87 ± 5.41* |
|                | 8 | <i>H2<sup>fx/fx</sup></i>             | 553 ± 54              | 28.68 ± 2.85                | 7.13 ± 0.99 | 10.45 ± 1.59                | 31.44 ± 6.42  |
| 10             | 7 | <i>Hand1LV-Cre H2<sup>fx/fx</sup></i> | 515 ± 32              | 33.72 ± 6.31 <sup>@</sup> * | 7.82 ± 0.93 | 10.53 ± 1.15 <sup>@</sup> * | 33.98 ± 6.41  |
|                | 8 | <i>H2<sup>fx/fx</sup></i>             | 514 ± 51              | 28.59 ± 1.63                | 7.03 ± 1.35 | 8.29 ± 2.69                 | 35.54 ± 5.40  |
| 15             | 6 | <i>Hand1LV-Cre H2<sup>fx/fx</sup></i> | 522 ± 38              | 31.99 ± 2.55*               | 7.19 ± 1.2  | 9.52 ± 0.98                 | 37.49 ± 7.98  |
|                | 8 | <i>H2<sup>fx/fx</sup></i>             | 546 ± 44              | 29.99 ± 2.55                | 6.51 ± 0.09 | 9.24 ± 1.27                 | 40.96 ± 4.94  |
| 20             | 8 | <i>Hand1LV-Cre H2<sup>fx/fx</sup></i> | 536 ± 58              | 30.77 ± 2.65                | 7.76 ± 0.53 | 9.48 ± 0.59                 | 36.85 ± 8.37  |
|                | 8 | <i>H2<sup>fx/fx</sup></i>             | 523 ± 45              | 29.51 ± 1.94                | 7.71 ± 1.04 | 9.97 ± 0.83                 | 39.22 ± 7.26  |
| 25             | 6 | <i>Hand1LV-Cre H2<sup>fx/fx</sup></i> | 506 ± 39 <sup>#</sup> | 29.08 ± 2.37                | 7.84 ± 1.22 | 10.43 ± 1.49                | 37.57 ± 0.45  |
|                | 7 | <i>H2<sup>fx/fx</sup></i>             | 545 ± 24              | 28.40 ± 3.27                | 7.17 ± 1.15 | 9.69 ± 0.92                 | 36.88 ± 0.80  |

| Females - LEAD I |   |                                       |                  |                  |             |             |                           |
|------------------|---|---------------------------------------|------------------|------------------|-------------|-------------|---------------------------|
| Age (weeks)      | n | Genotype                              | Heart rate (bpm) | PR interval (ms) | QRS1 (ms)   | QRS2 (ms)   | QTc (ms)                  |
| 5                | 9 | <i>Hand1LV-Cre H2<sup>fx/fx</sup></i> | 512 ± 42         | 31.33 ± 1.30     | 6.53 ± 0.82 | 8.71 ± 0.93 | 37.05 ± 3.32              |
|                  | 9 | <i>H2<sup>fx/fx</sup></i>             | 544 ± 39         | 29.40 ± 3.60     | 6.32 ± 0.46 | 9.19 ± 0.66 | 34.39 ± 2.48              |
| 10               | 9 | <i>Hand1LV-Cre H2<sup>fx/fx</sup></i> | 509 ± 34         | 32.21 ± 3.43     | 7.03 ± 0.60 | 8.91 ± 0.78 | 34.74 ± 6.11 <sup>#</sup> |
|                  | 9 | <i>H2<sup>fx/fx</sup></i>             | 527 ± 50         | 30.67 ± 3.00     | 6.71 ± 0.64 | 9.20 ± 0.63 | 26.91 ± 7.37              |
| 15               | 9 | <i>Hand1LV-Cre H2<sup>fx/fx</sup></i> | 511 ± 53         | 30.89 ± 2.47     | 6.93 ± 0.81 | 9.13 ± 0.74 | 36.13 ± 4.03              |
|                  | 8 | <i>H2<sup>fx/fx</sup></i>             | 527 ± 49         | 29.59 ± 1.92     | 6.90 ± 0.50 | 9.42 ± 0.56 | 36.14 ± 7.38              |
| 20               | 9 | <i>Hand1LV-Cre H2<sup>fx/fx</sup></i> | 495 ± 53         | 33.49 ± 2.98     | 7.47 ± 0.98 | 8.77 ± 0.99 | 37.19 ± 7.23              |
|                  | 8 | <i>H2<sup>fx/fx</sup></i>             | 491 ± 22         | 31.64 ± 3.66     | 7.46 ± 0.58 | 9.52 ± 1.73 | 36.37 ± 5.46              |
| 25               | 9 | <i>Hand1LV-Cre H2<sup>fx/fx</sup></i> | 515 ± 29         | 34.28 ± 3.66     | 7.45 ± 0.55 | 9.31 ± 0.79 | 33.51 ± 4.28              |
|                  | 8 | <i>H2<sup>fx/fx</sup></i>             | 526 ± 40         | 31.81 ± 3.21     | 7.12 ± 0.53 | 9.84 ± 0.65 | 31.49 ± 9.08              |

| Males - LEAD II |   |                                       |                  |             |              |              |  |
|-----------------|---|---------------------------------------|------------------|-------------|--------------|--------------|--|
| Age (weeks)     | n | Genotype                              | PR interval (ms) | QRS1 (ms)   | QRS2 (ms)    | QTc (ms)     |  |
| 5               | 8 | <i>Hand1LV-Cre H2<sup>fx/fx</sup></i> | 30.35 ± 6.97     | 6.55 ± 0.61 | 9.32 ± 1.13  | 33.75 ± 3.90 |  |
|                 | 8 | <i>H2<sup>fx/fx</sup></i>             | 29.53 ± 2.51     | 6.68 ± 0.61 | 9.32 ± 1.02  | 31.81 ± 6.37 |  |
| 10              | 7 | <i>Hand1LV-Cre H2<sup>fx/fx</sup></i> | 32.25 ± 5.41     | 6.98 ± 0.48 | 9.82 ± 0.85  | 32.74 ± 7.39 |  |
|                 | 8 | <i>H2<sup>fx/fx</sup></i>             | 27.92 ± 1.58     | 6.68 ± 0.47 | 9.31 ± 0.95  | 38.49 ± 4.92 |  |
| 15              | 6 | <i>Hand1LV-Cre H2<sup>fx/fx</sup></i> | 31.08 ± 2.82*    | 6.83 ± 0.62 | 9.16 ± 0.52  | 40.03 ± 2.86 |  |
|                 | 8 | <i>H2<sup>fx/fx</sup></i>             | 28.02 ± 2.80     | 7.23 ± 0.72 | 9.42 ± 0.47  | 34.84 ± 6.92 |  |
| 20              | 8 | <i>Hand1LV-Cre H2<sup>fx/fx</sup></i> | 31.07 ± 2.18     | 7.12 ± 0.69 | 9.60 ± 1.15  | 38.72 ± 5.72 |  |
|                 | 8 | <i>H2<sup>fx/fx</sup></i>             | 29.68 ± 2.22     | 7.18 ± 0.60 | 9.55 ± 0.81  | 35.65 ± 6.62 |  |
| 25              | 6 | <i>Hand1LV-Cre H2<sup>fx/fx</sup></i> | 28.59 ± 2.86     | 7.48 ± 0.94 | 10.05 ± 1.48 | 36.52 ± 6.77 |  |
|                 | 7 | <i>H2<sup>fx/fx</sup></i>             | 26.09 ± 6.42     | 7.65 ± 1.98 | 10.18 ± 1.92 | 37.34 ± 9.15 |  |

| Females - LEAD II |   |                                       |                  |             |             |                            |  |
|-------------------|---|---------------------------------------|------------------|-------------|-------------|----------------------------|--|
| Age (weeks)       | n | Genotype                              | PR interval (ms) | QRS1 (ms)   | QRS2 (ms)   | QTc (ms)                   |  |
| 5                 | 9 | <i>Hand1LV-Cre H2<sup>fx/fx</sup></i> | 31.73 ± 1.43     | 6.51 ± 0.40 | 8.87 ± 0.74 | 31.73 ± 1.43 <sup>@#</sup> |  |
|                   | 9 | <i>H2<sup>fx/fx</sup></i>             | 27.64 ± 3.92     | 6.54 ± 0.45 | 9.13 ± 0.68 | 32.91 ± 4.35               |  |
| 10                | 9 | <i>Hand1LV-Cre H2<sup>fx/fx</sup></i> | 31.86 ± 3.46     | 6.72 ± 0.53 | 9.02 ± 1.12 | 34.64 ± 5.39               |  |
|                   | 9 | <i>H2<sup>fx/fx</sup></i>             | 31.39 ± 3.69     | 6.87 ± 0.53 | 9.12 ± 0.81 | 30.66 ± 7.07               |  |
| 15                | 9 | <i>Hand1LV-Cre H2<sup>fx/fx</sup></i> | 31.11 ± 3.11*    | 6.89 ± 0.34 | 8.97 ± 0.54 | 38.74 ± 5.97               |  |
|                   | 8 | <i>H2<sup>fx/fx</sup></i>             | 28.27 ± 3.25     | 7.21 ± 0.45 | 9.45 ± 0.89 | 35.84 ± 7.59               |  |
| 20                | 9 | <i>Hand1LV-Cre H2<sup>fx/fx</sup></i> | 33.51 ± 3.43     | 7.05 ± 0.54 | 9.07 ± 0.95 | 35.00 ± 10.00              |  |
|                   | 8 | <i>H2<sup>fx/fx</sup></i>             | 31.58 ± 2.30     | 7.58 ± 1.24 | 9.62 ± 0.88 | 34.91 ± 7.71               |  |
| 25                | 9 | <i>Hand1LV-Cre H2<sup>fx/fx</sup></i> | 32.39 ± 6.55     | 7.16 ± 0.73 | 9.33 ± 1.09 | 34.26 ± 4.57               |  |
|                   | 8 | <i>H2<sup>fx/fx</sup></i>             | 30.49 ± 4.66     | 7.29 ± 0.57 | 9.49 ± 0.53 | 33.12 ± 7.96               |  |

Normality calculated with Shapiro-Wilk normality test. For normal data sets, student's T-test used to calculate significance. For not normal data sets, Mann-Whitney U test used to calculate significance.

<sup>@</sup> Data not normal      <sup>#</sup> p<0.01      \* p<0.05 vs H2control
