# Supplementary figures and images for: Neonatal Deletion of Hand1 and Hand2 within Murine Cardiac Conduction System Reveals a Novel Role for HAND2 in Rhythm Homeostasis
Source: MDPI journal article supplement (doi:10.3390/jcdd9070214), 2022-07-04

**Figure S1. ECG Analysis of Cntn2Cre H1fx/fx**

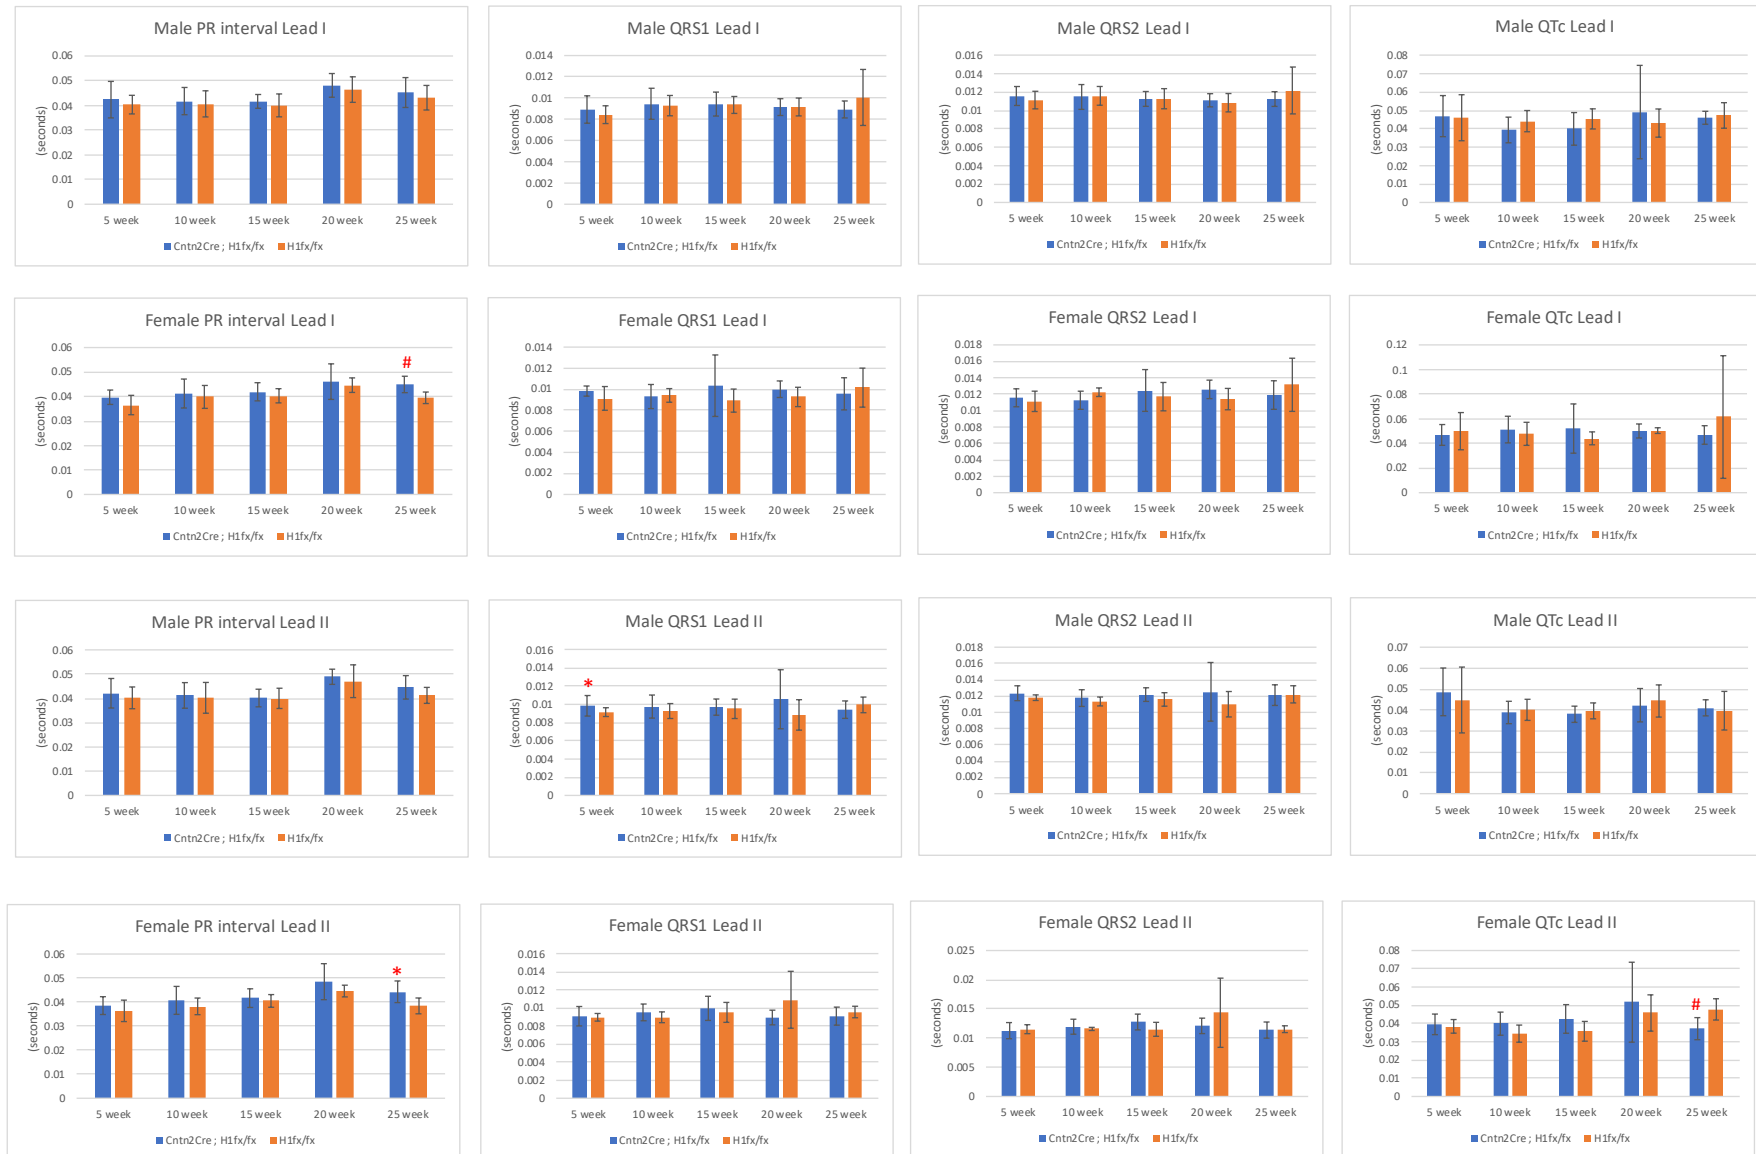

Supplement: s1 [file s1]

**Figure S2 ECG Analysis of Cntn2Cre H2fx/fx**

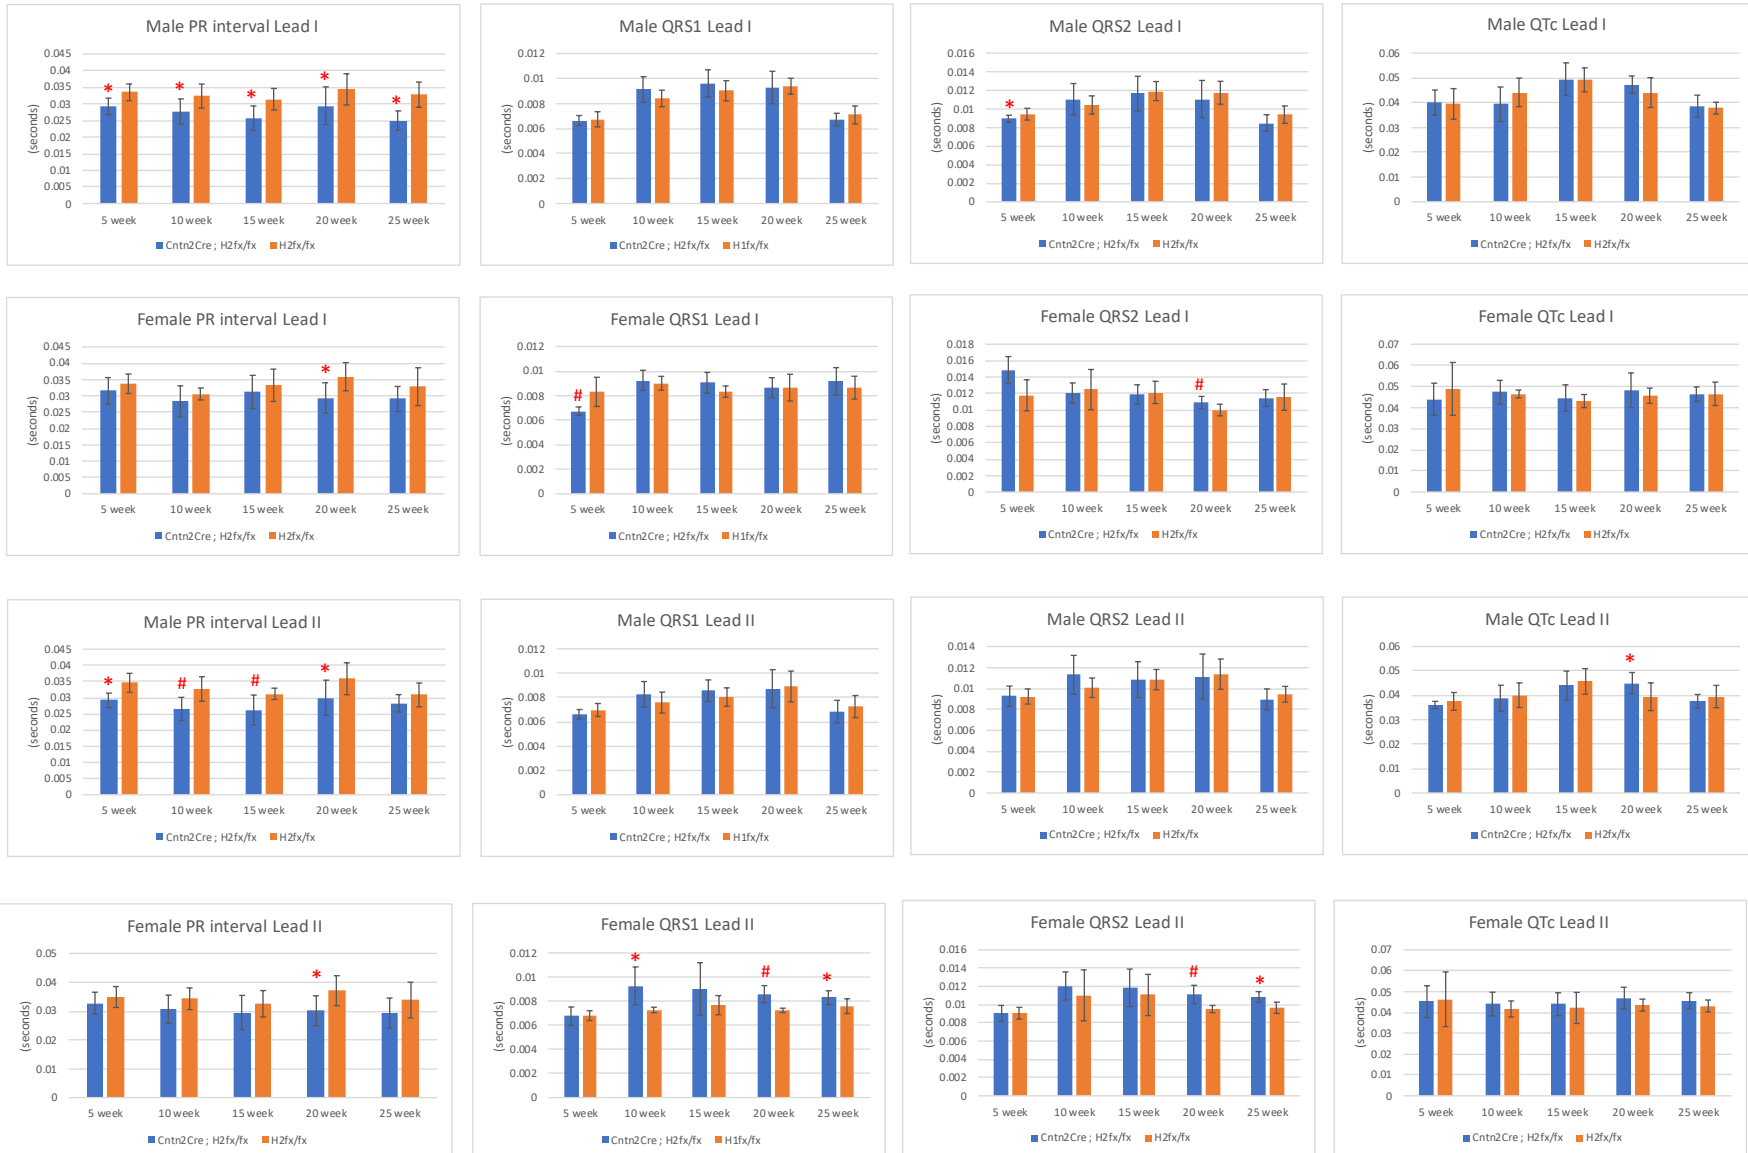

Supplement: s1 [file s1]

**Figure S4: ECG Analysis of H1LVCre ; H2fx/fx**

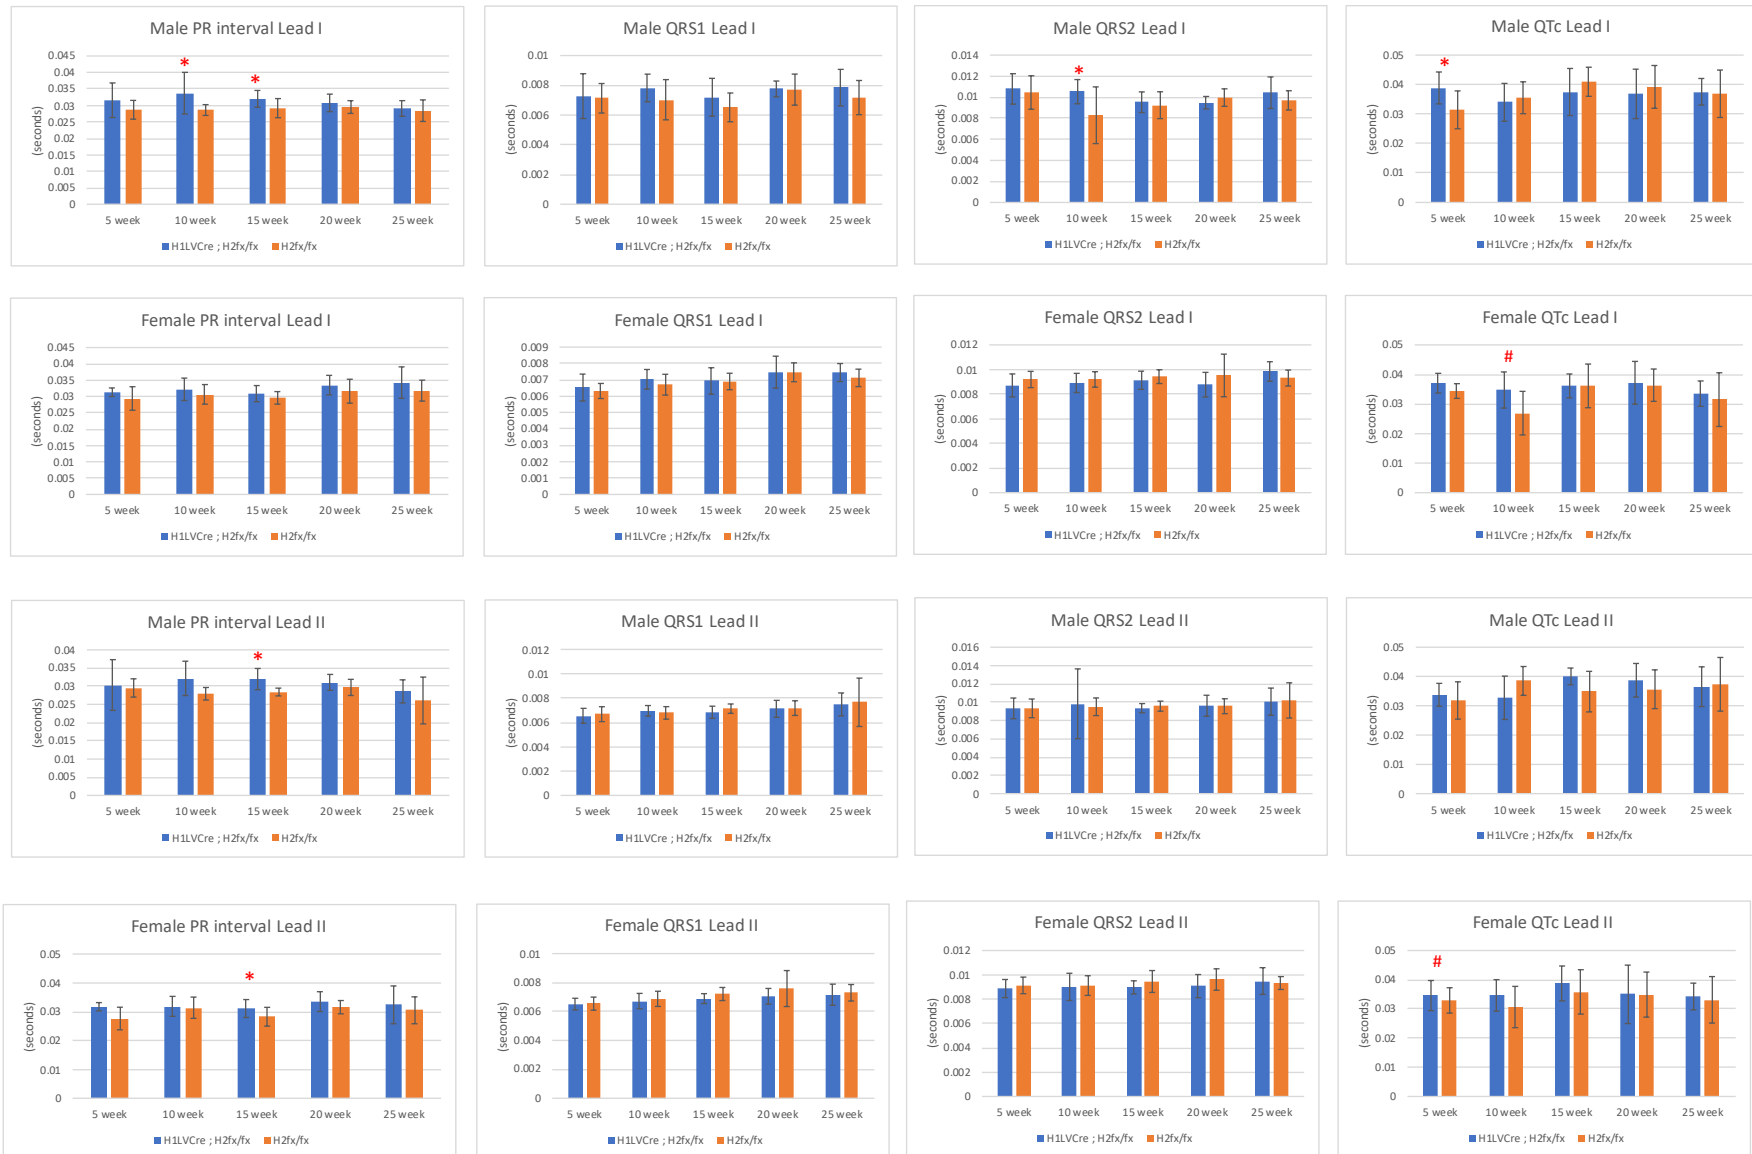

Supplement: s1 [file s1]

Figure S5: Male vs Female control comparison

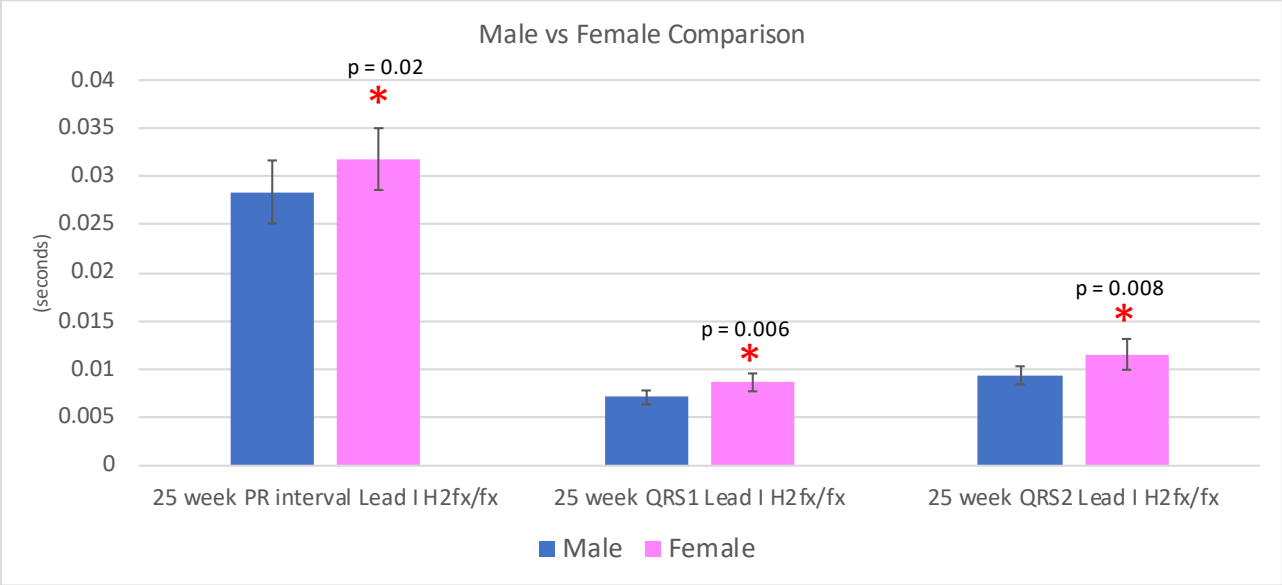

Supplement: s1 [file s1]

**Figure S3: ECG Analysis of Cntn2Cre H1fx/fx H2fx/fx**

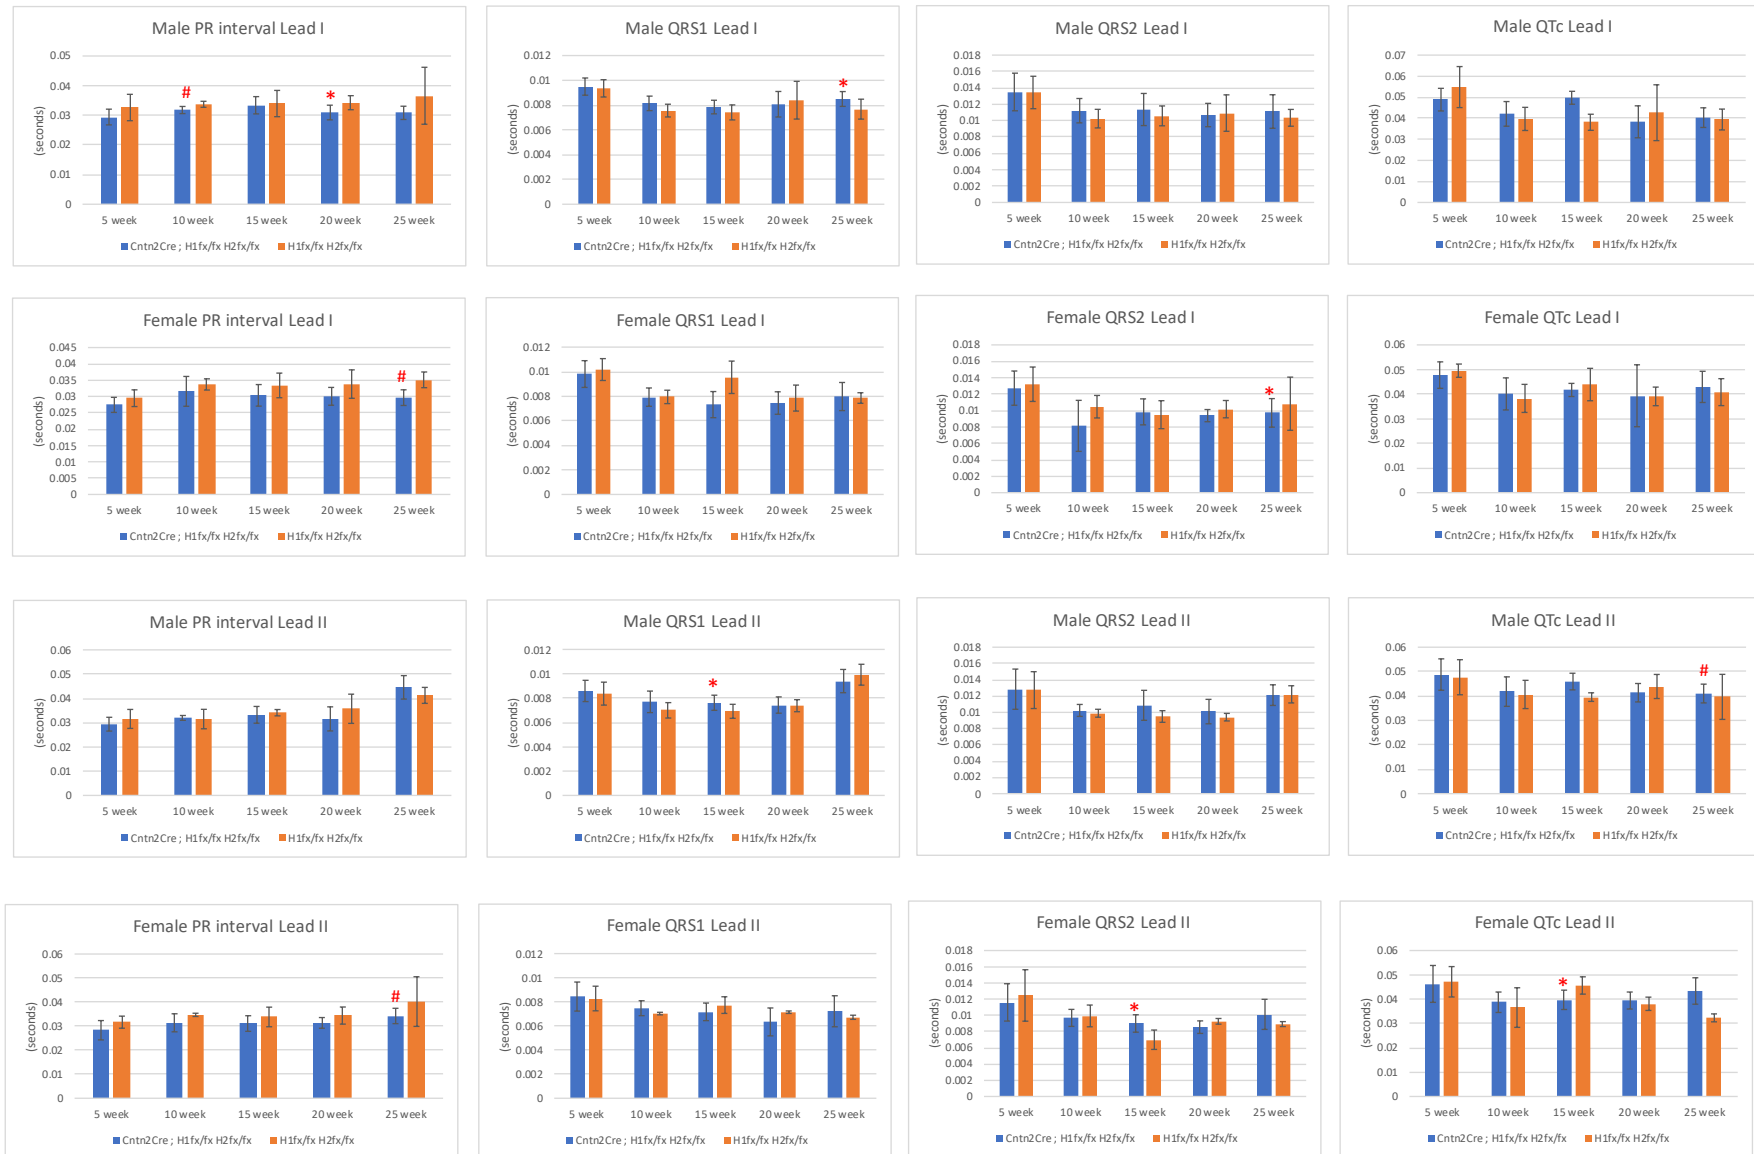

Supplement: s1 [file s1]
